# Supplementary material for: Identifying functional subtypes and common mechanisms of rheumatoid arthritis and systemic lupus erythematosus
Source: Research Square preprint supplement (doi:10.21203/rs.3.rs-3358235/v1), 2023-10-09
Supplement: Supplementary file 1 [file 737c22c170bb5d5cc7a8a298.doc]

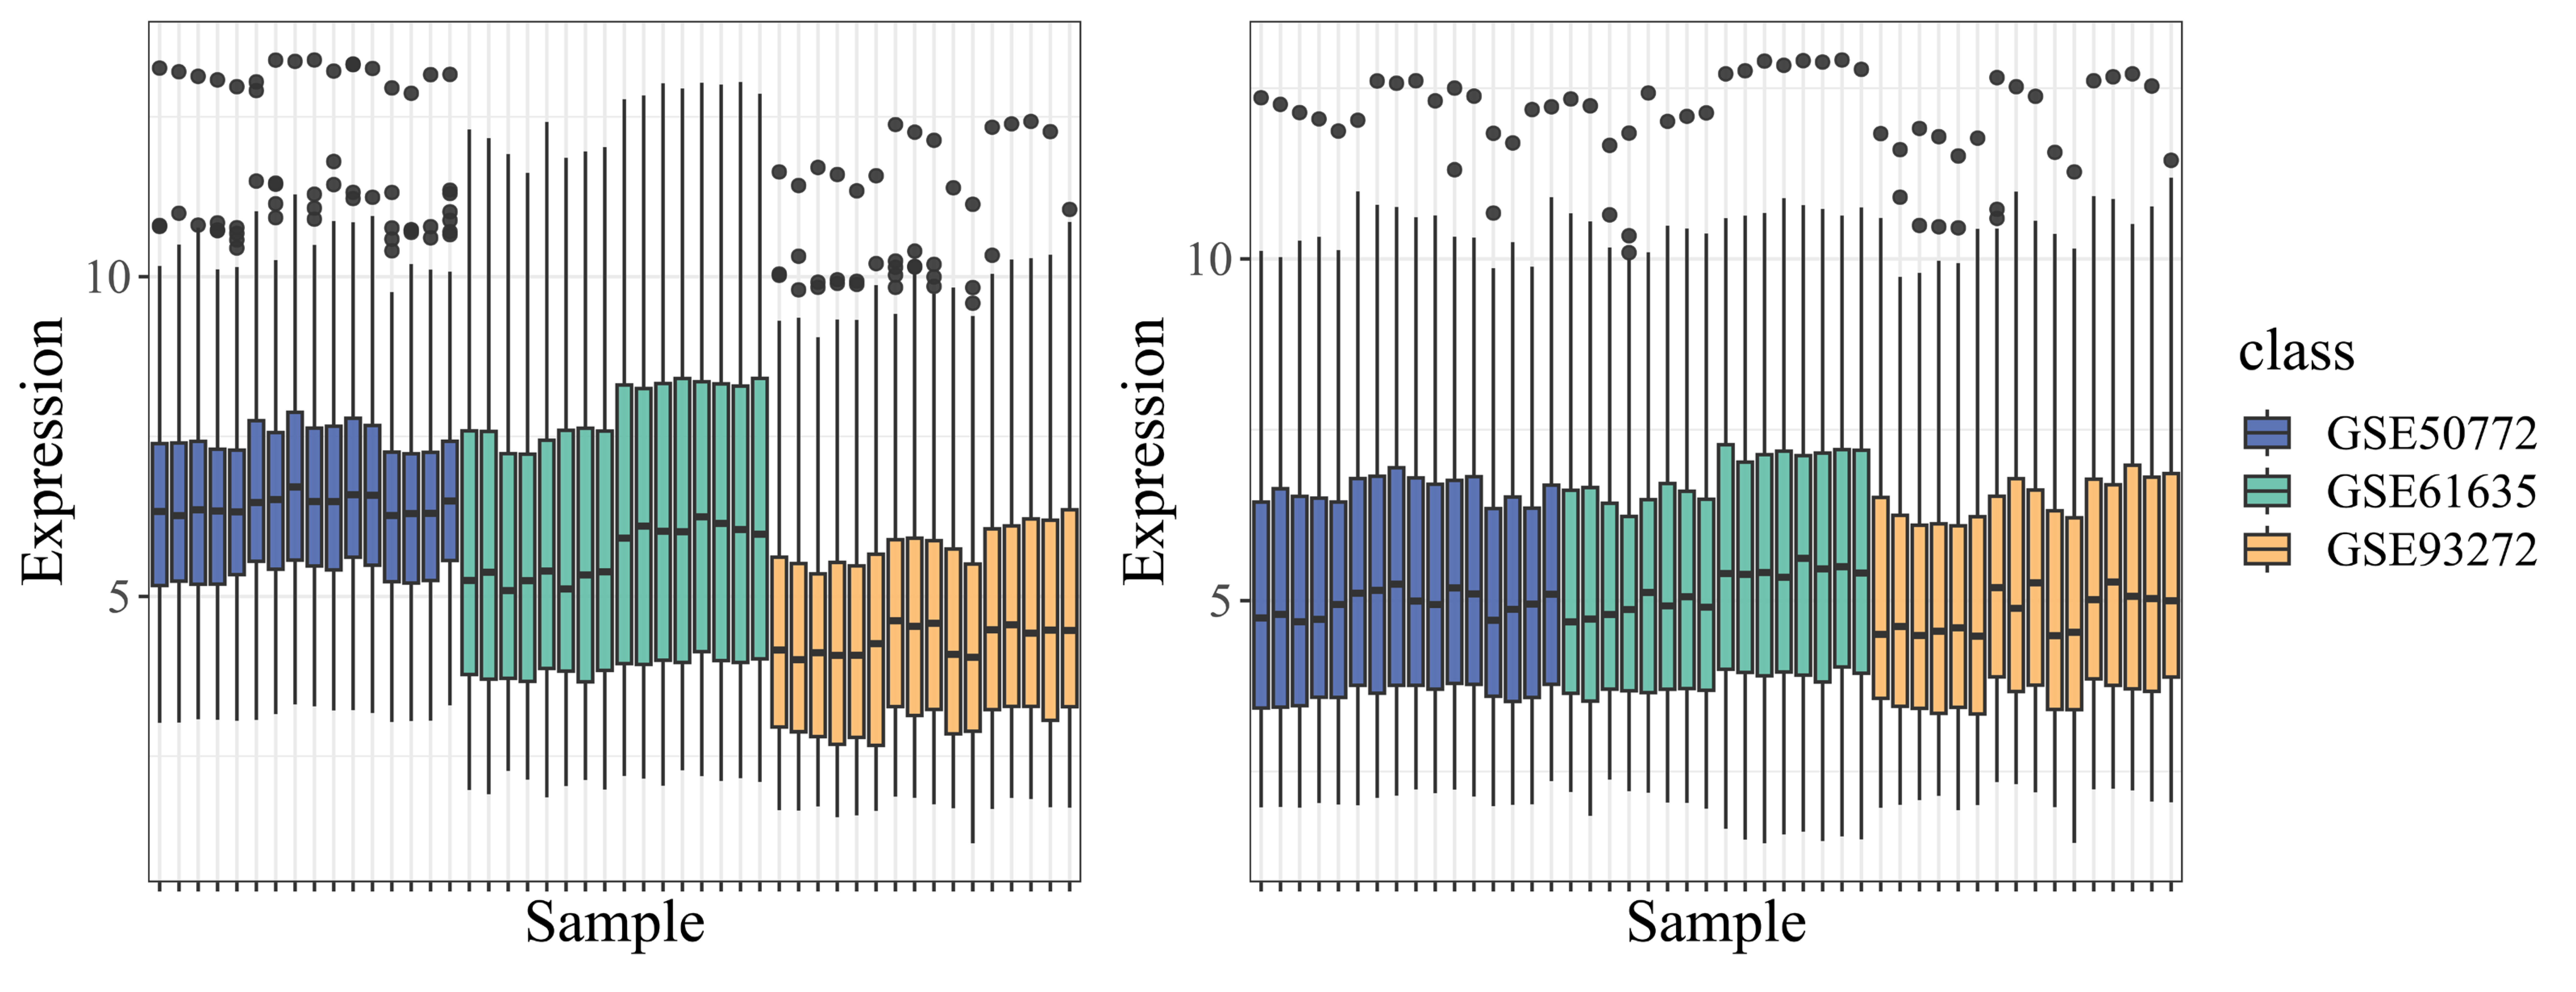


**Figure S1.** Data expression distribution before and after batch removal


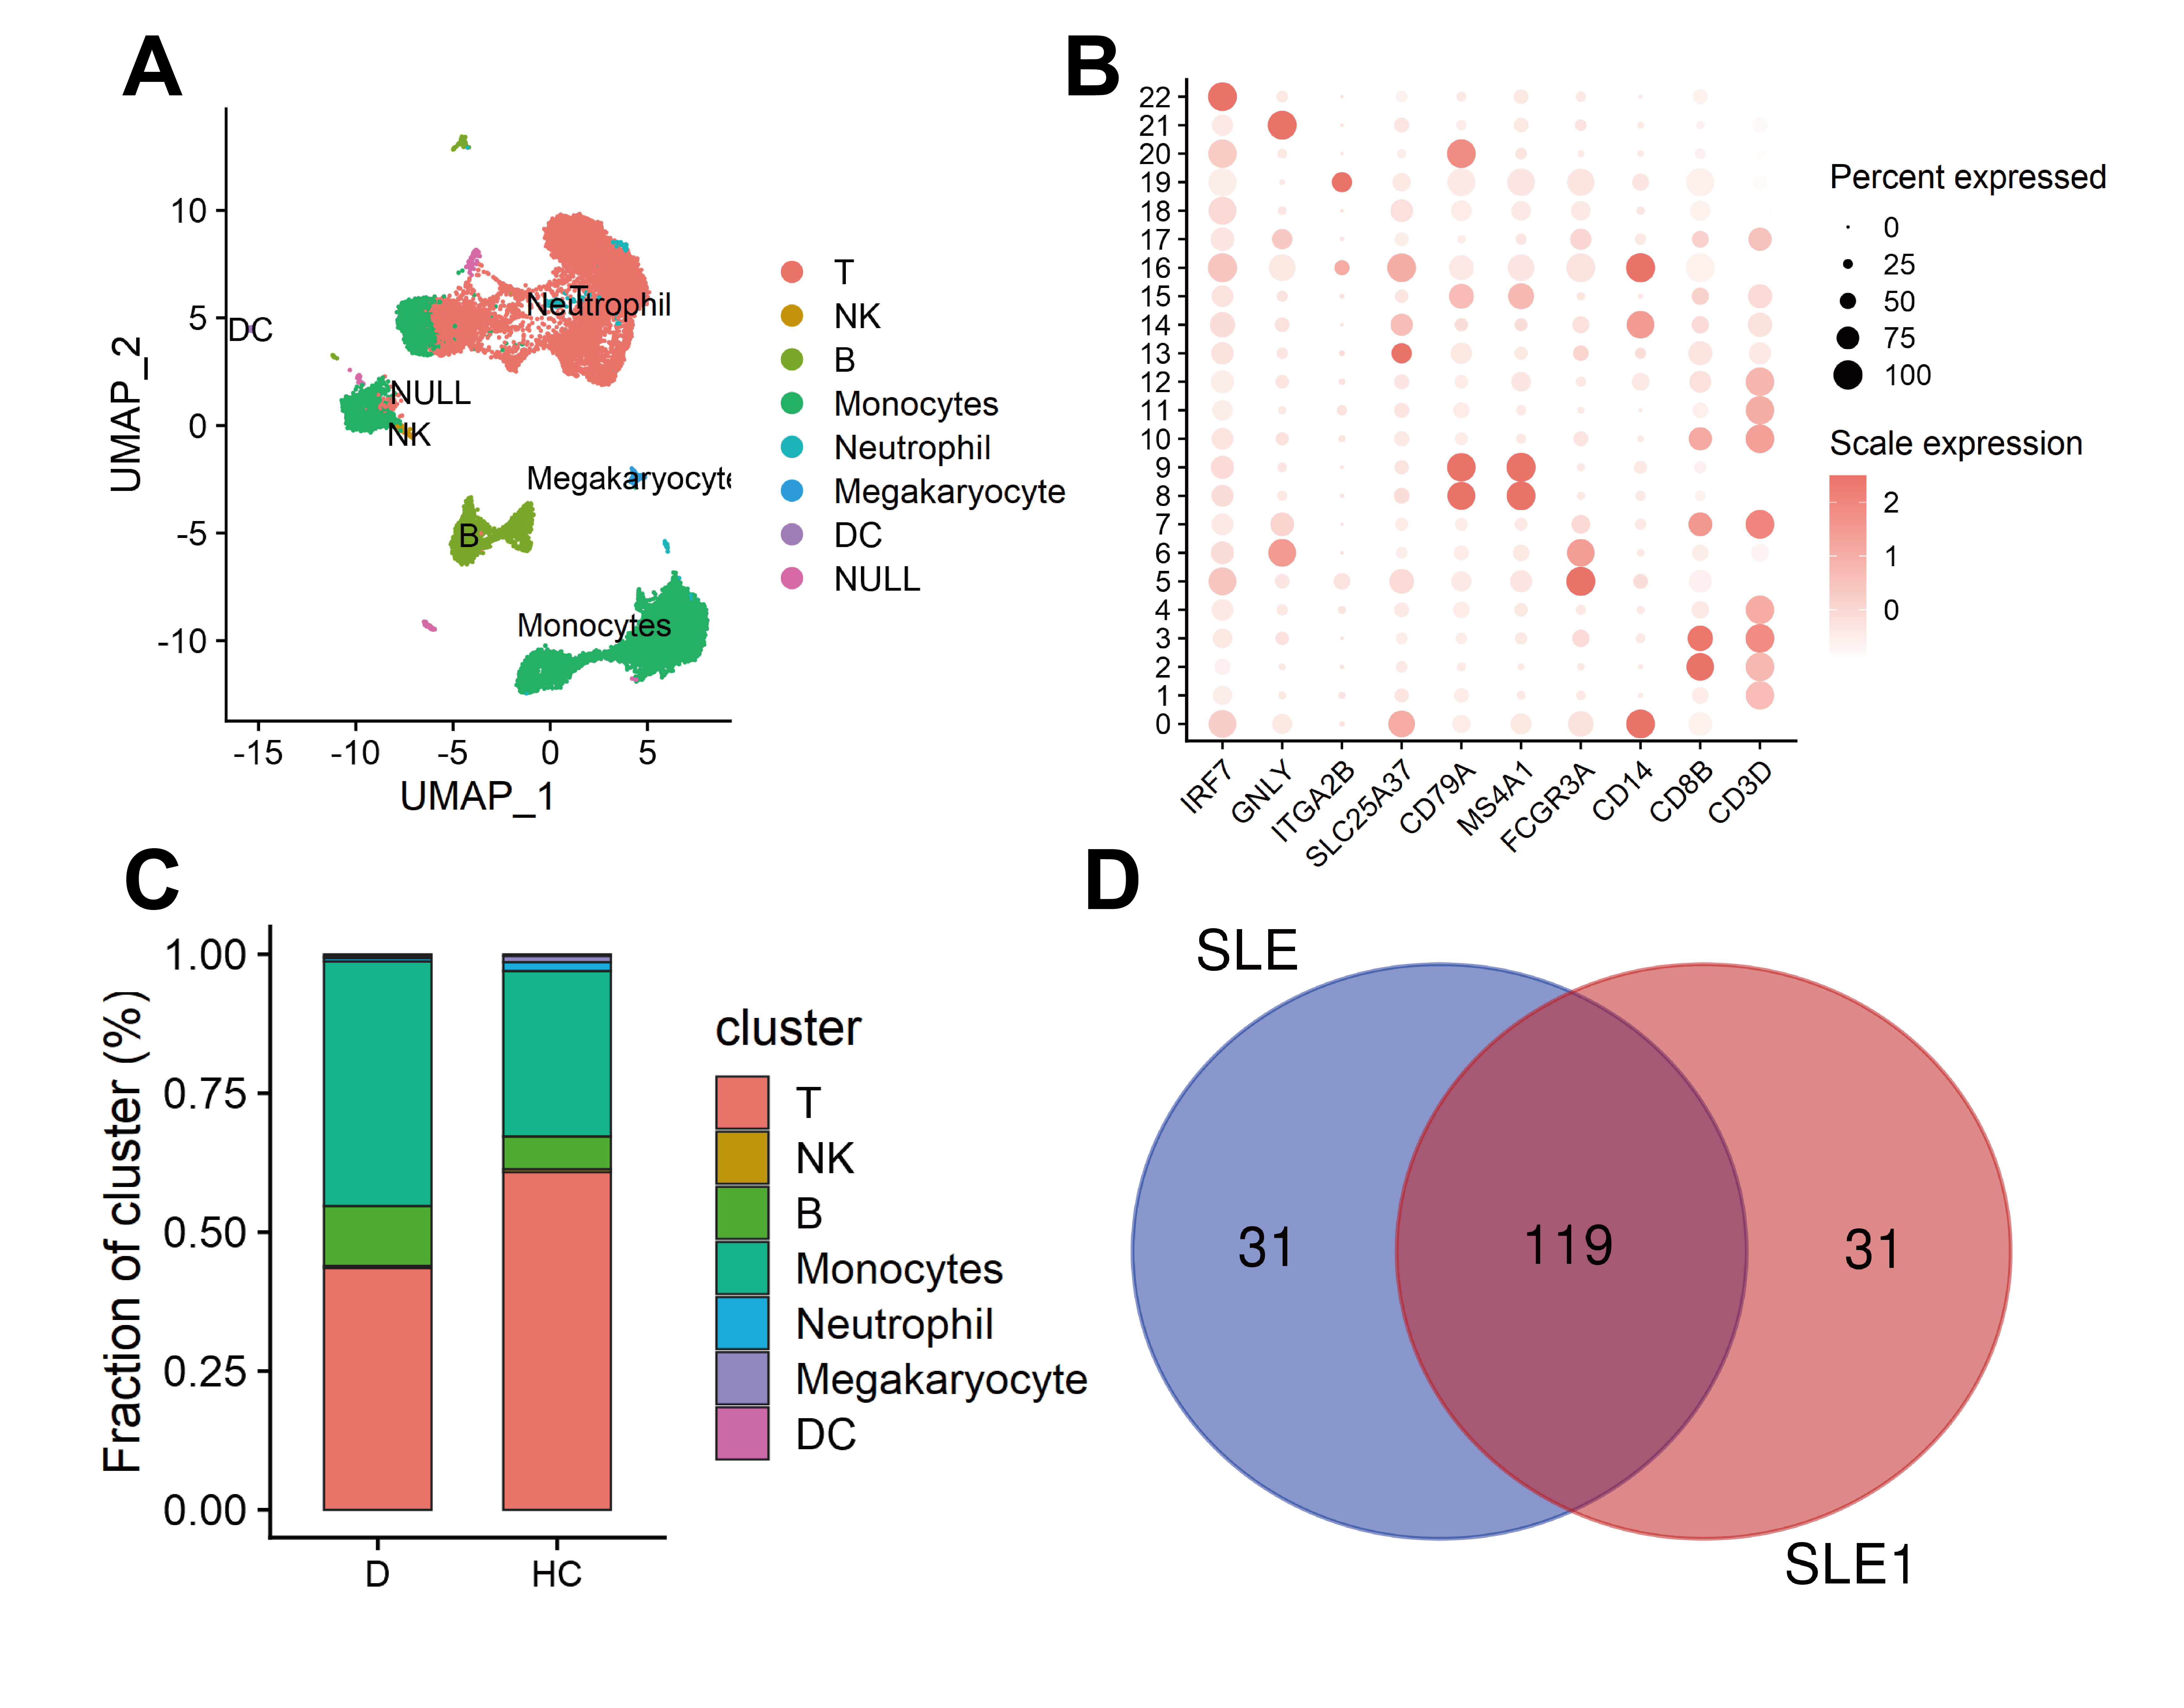


**Figure S2.** Test the stability of single-cell analysis results in different SLE samples (sample 1).


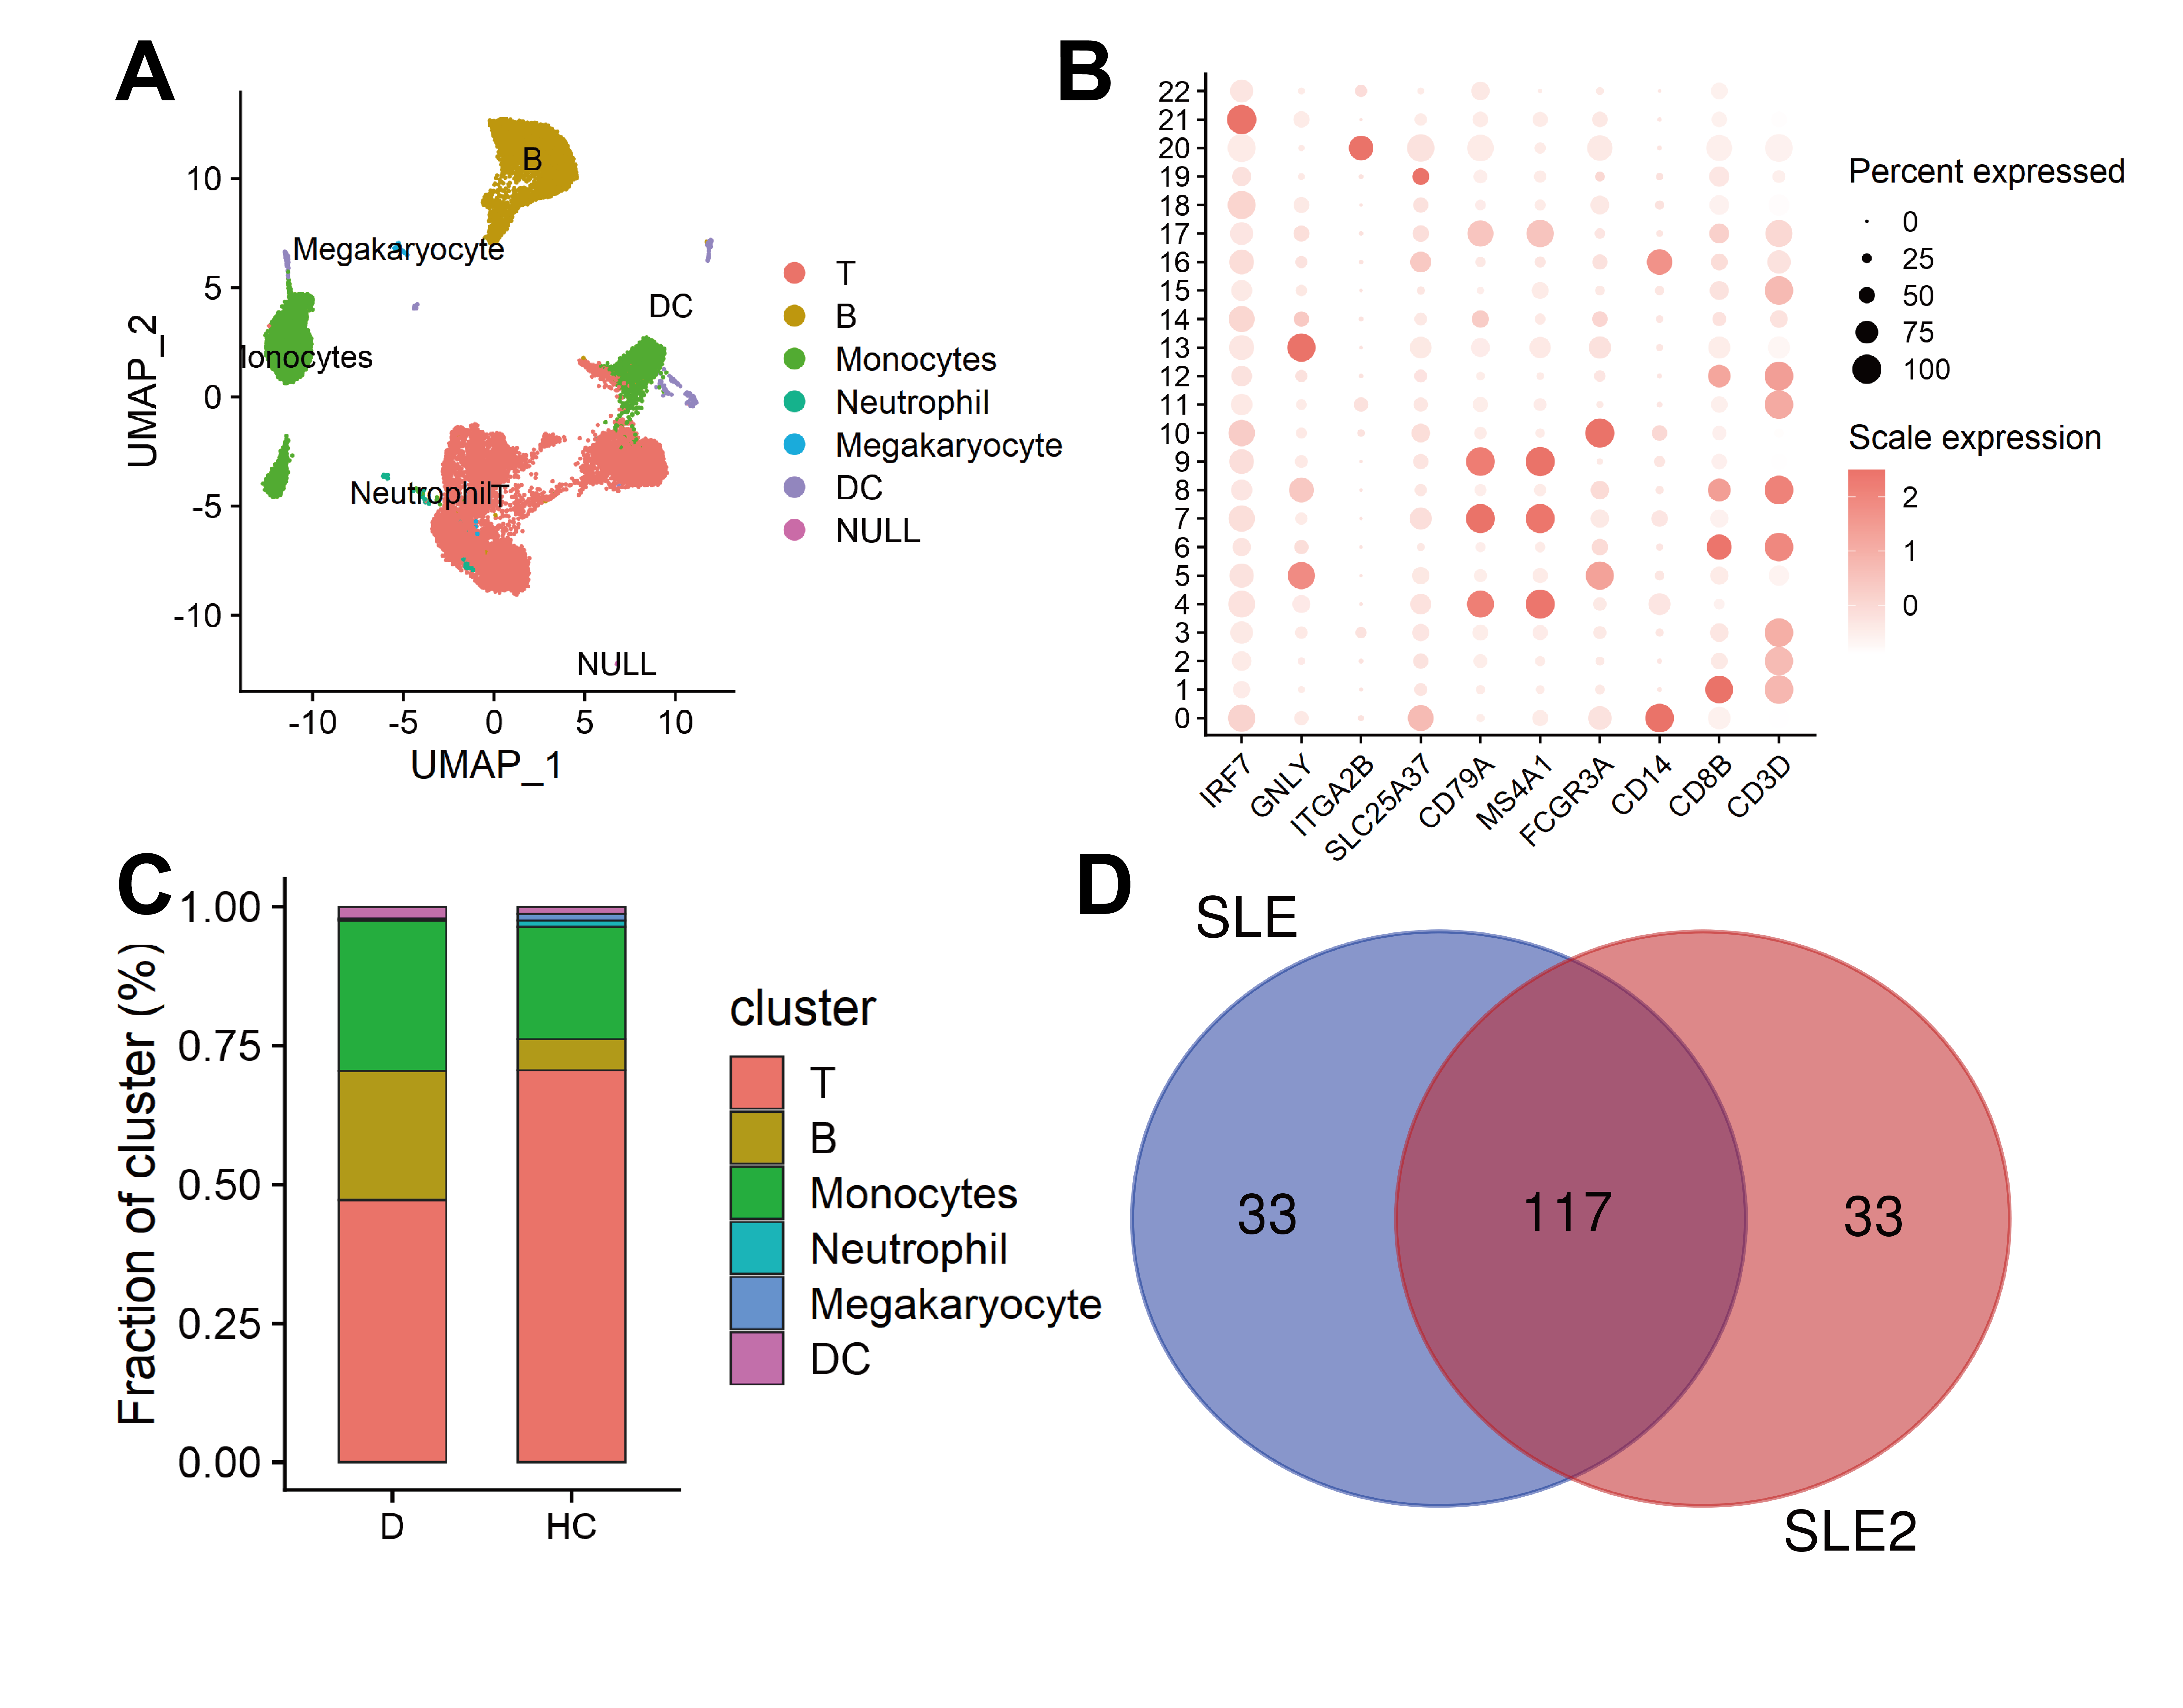


**Figure S3.** Test the stability of single-cell analysis results in different SLE samples (sample 2).


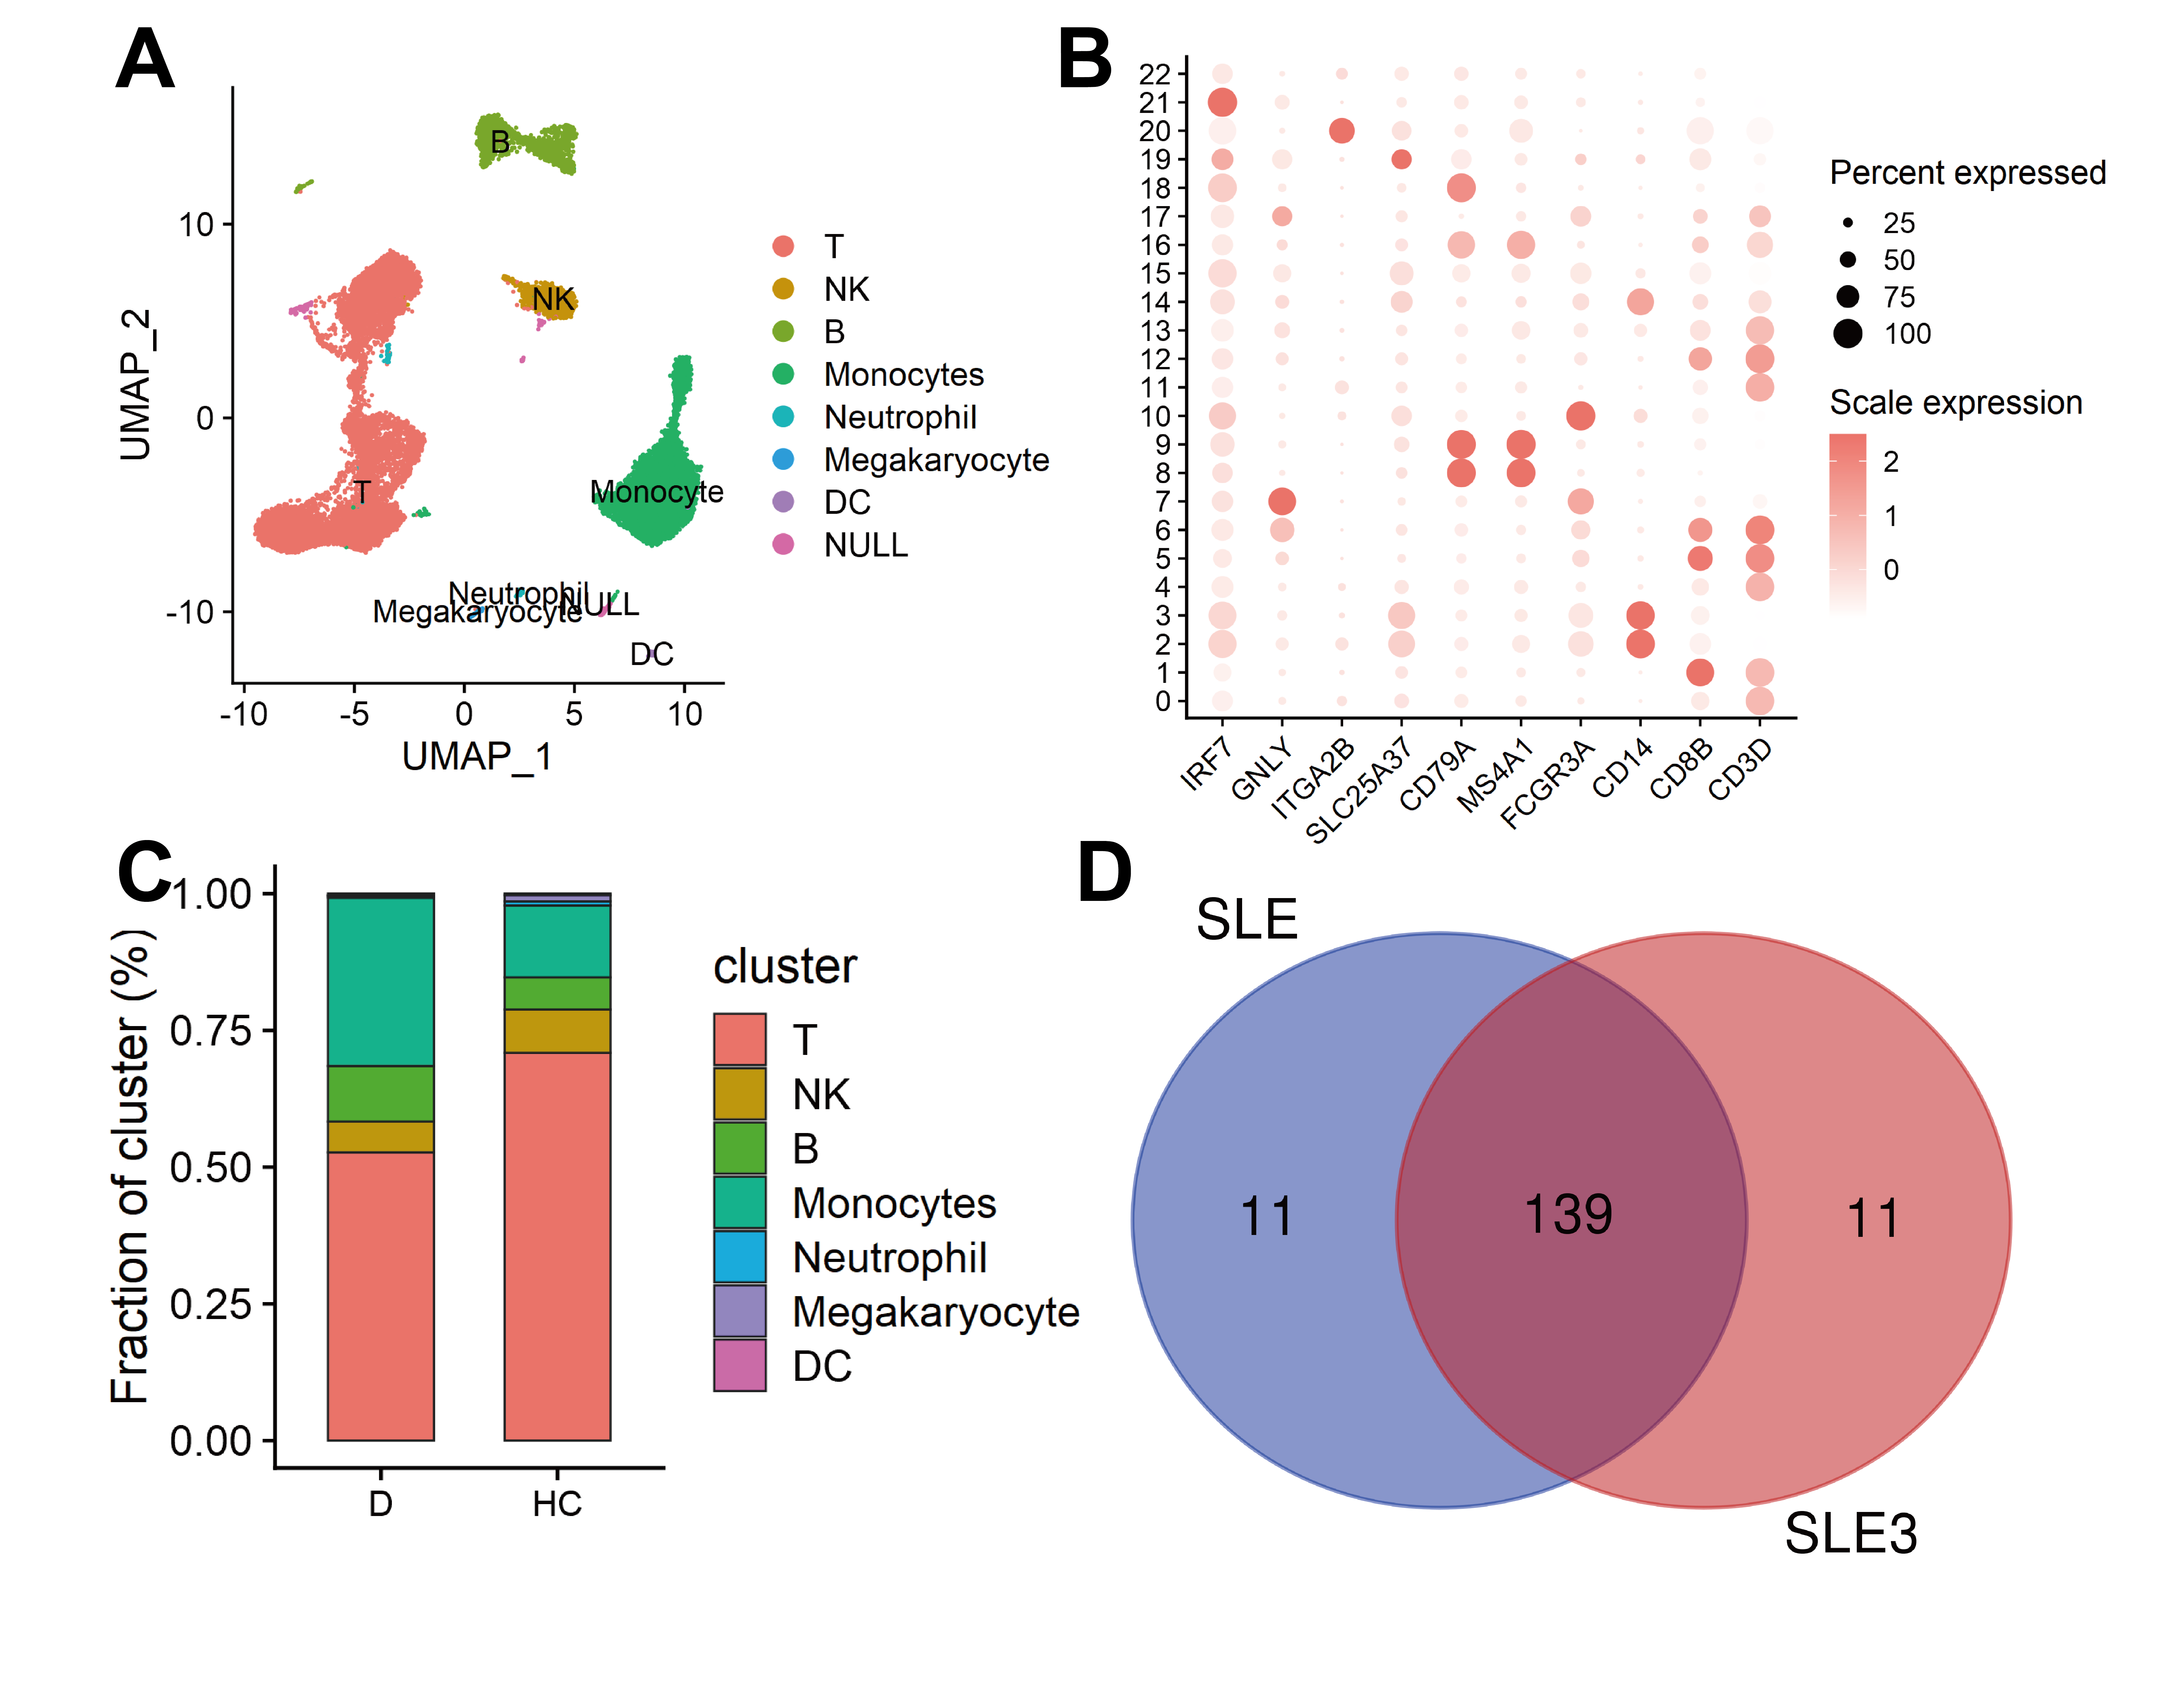


**Figure S4.** Test the stability of single-cell analysis results in different SLE samples (sample 3).
